# Supplementary material for: J-aggregation of ionic liquid solutions of meso-tetrakis(4-sulfonatophenyl)porphyrin
Source: Royal Society of Chemistry journal article supplement (doi:10.1039/b920500d), 2009-12-21
Supplement: b920500d.pdf [file b920500d.pdf]

Supplementary Material for PCCP  
This journal is © The Owner Societies 2010

## **Electronic Supplementary Information (ESI)**

### **J-aggregation of ionic liquid solutions of *meso*-tetrakis(4-sulfonatophenyl)porphyrin**

Maroof Ali,<sup>a</sup> Vinod Kumar,<sup>a</sup> Sheila N. Baker,<sup>b</sup> Gary A. Baker<sup>b</sup> and Siddharth Pandey\*<sup>a</sup>

<sup>a</sup> *Department of Chemistry, Indian Institute of Technology Delhi, Hauz Khas, New Delhi – 110016, India. Tel: 91-11-26596503; E-mail: [sipandey@chemistry.iitd.ac.in](mailto:sipandey@chemistry.iitd.ac.in)*

<sup>b</sup> *Chemical Sciences Division, Oak Ridge National Laboratory, Oak Ridge, TN 37831, USA. Tel: 865-241-9361.*

## Table of Contents

|                                                                                                                                                                                                                                                                                                                                                                                                                                          | Page No. |
|------------------------------------------------------------------------------------------------------------------------------------------------------------------------------------------------------------------------------------------------------------------------------------------------------------------------------------------------------------------------------------------------------------------------------------------|----------|
| <b>Table S1:</b> Absorbance ([TPPS] = 10.0 $\mu\text{M}$ ) and fluorescence emission ([TPPS] = 5.0 $\mu\text{M}$ ) maxima of TPPS in aqueous HCl-added [bmim][BF <sub>4</sub> ].                                                                                                                                                                                                                                                         | 3        |
| <b>Figure S1:</b> Fluorescence emission spectra of TPPS (1–20 $\mu\text{M}$ ), at different excitation wavelengths within neat [bmim][BF <sub>4</sub> ] at ambient conditions.                                                                                                                                                                                                                                                           | 4        |
| <b>Figure S2:</b> TPPS concentration-dependent absorption spectra within [bmim][BF <sub>4</sub> ] in the presence of different wt% of 0.2 M aqueous HCl.                                                                                                                                                                                                                                                                                 | 5        |
| <b>Figure S3:</b> Absorbance spectra of TPPS (10 $\mu\text{M}$ ) within [bmim][BF <sub>4</sub> ] in presence of different wt% of pH 2.0 and 3.0 aqueous HCl and deionized water at ambient conditions.                                                                                                                                                                                                                                   | 6        |
| <b>Figure S4:</b> Fluorescence excitation spectra with $\lambda_{\text{em}} = 690$ nm of TPPS (5 $\mu\text{M}$ ) within [bmim][BF <sub>4</sub> ] in presence of 0 to 40 wt% of 0.2 M aqueous HCl at ambient conditions.                                                                                                                                                                                                                  | 7        |
| <b>Figure S5:</b> Emission spectra of 5 $\mu\text{M}$ TPPS with $\lambda_{\text{excitation}} = 440$ nm (panel A) and $\lambda_{\text{ex}} = 490$ nm (panel B) within [bmim][BF <sub>4</sub> ] in presence of different wt% of 1.0 M aqueous HCl at ambient conditions. Panel C and inset of panel B shows excitation spectra with $\lambda_{\text{em}} = 690$ nm and RLS spectra of same solutions, respectively, at ambient conditions. | 8        |
| <b>Figure S6:</b> Excitation spectra of TPPS with $\lambda_{\text{em}} = 650$ nm at different TPPS concentrations within [bmim][BF <sub>4</sub> ] in presence of varying wt% of deionized water at ambient conditions. Insets shows the emission spectra of the same solutions at $\lambda_{\text{ex}} = 420$ nm.                                                                                                                        | 9        |

**Table S1:** Absorbance ([TPPS] = 10.0  $\mu$ M) and fluorescence emission ([TPPS] = 5.0  $\mu$ M) maxima of TPPS in aqueous HCl-added [bmim][BF<sub>4</sub>] at ambient conditions.

| wt% of Water | Soret Bands (nm) |          |          | Emission Band (nm)/ $\lambda_{\text{excitation}}$ : 440 nm |       |       |
|--------------|------------------|----------|----------|------------------------------------------------------------|-------|-------|
|              | Aqueous HCl      |          |          | Aqueous HCl                                                |       |       |
|              | 0.1 M            | 0.2 M    | 1.0 M    | 0.1 M                                                      | 0.2 M | 1.0 M |
| 0.0          | 418              | 418      | 418      | 651                                                        | 651   | 649   |
| 2.0          | 418, 446         | 448, 478 | 448      | 651                                                        | 649   | 695   |
| 5.0          | 418, 446, 487    | 445, 485 | 447, 487 | 651                                                        | 686   | 690   |
| 10.0         | 418, 438, 487    | 444, 486 | 446, 489 | 683                                                        | 681   | 691   |
| 25.0         | 418, 438         | 438, 489 | 441, 489 | 680                                                        | 678   | 686   |
| 40.0         | 418, 436         | 436, 491 | 439, 492 | 678                                                        | 677   | 682   |

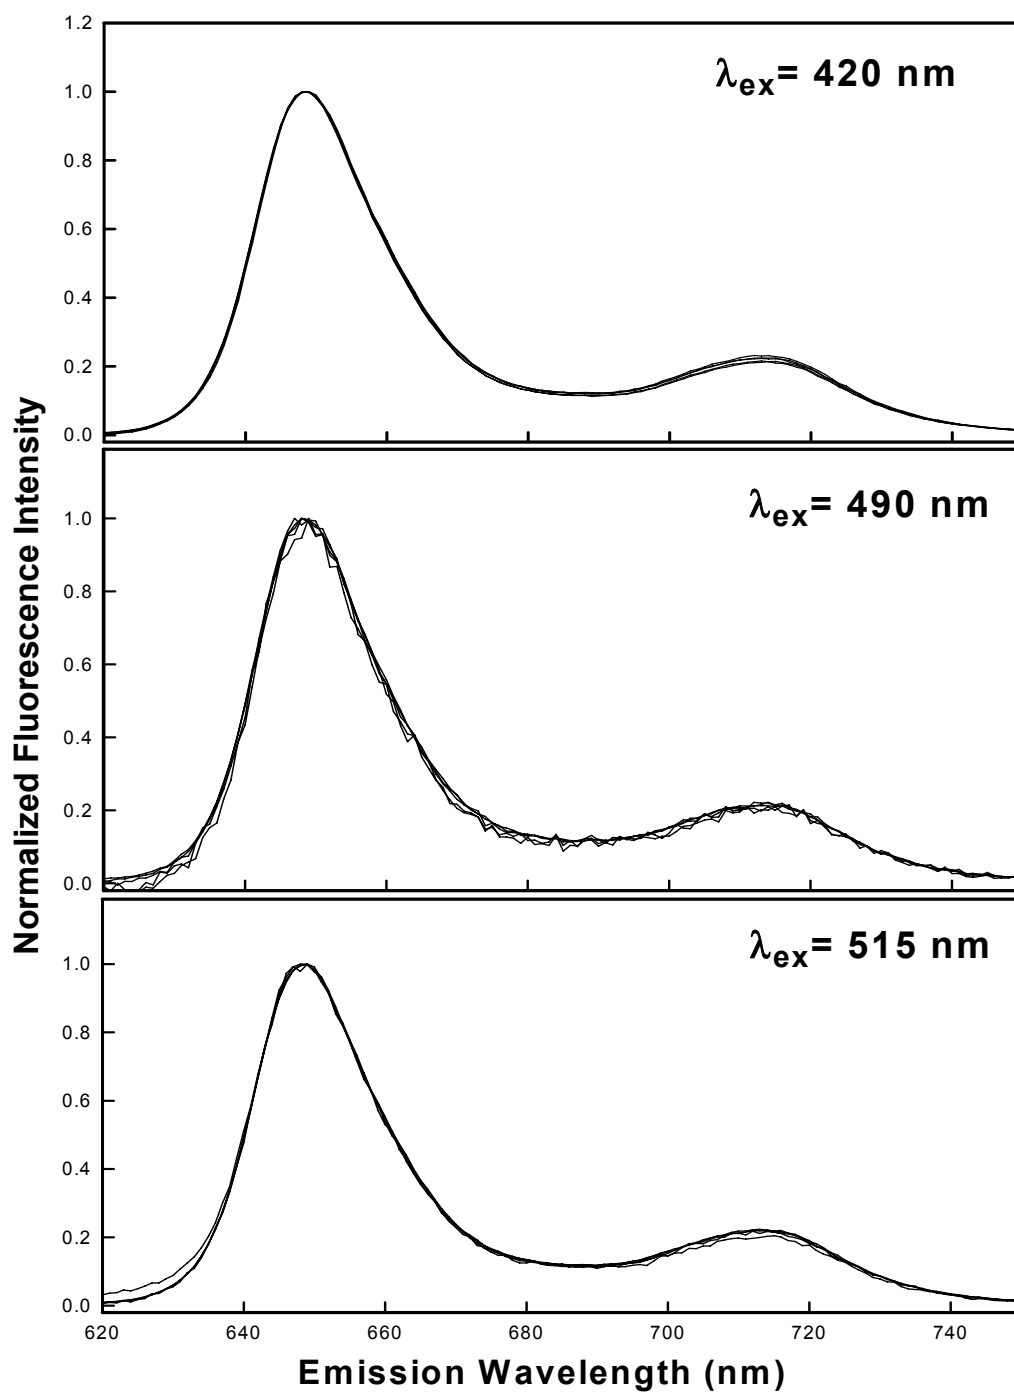

**Figure S1:** Fluorescence emission spectra of TPPS (1-20 μM), at different excitation wavelengths within neat [bmim][BF<sub>4</sub>] at ambient conditions.

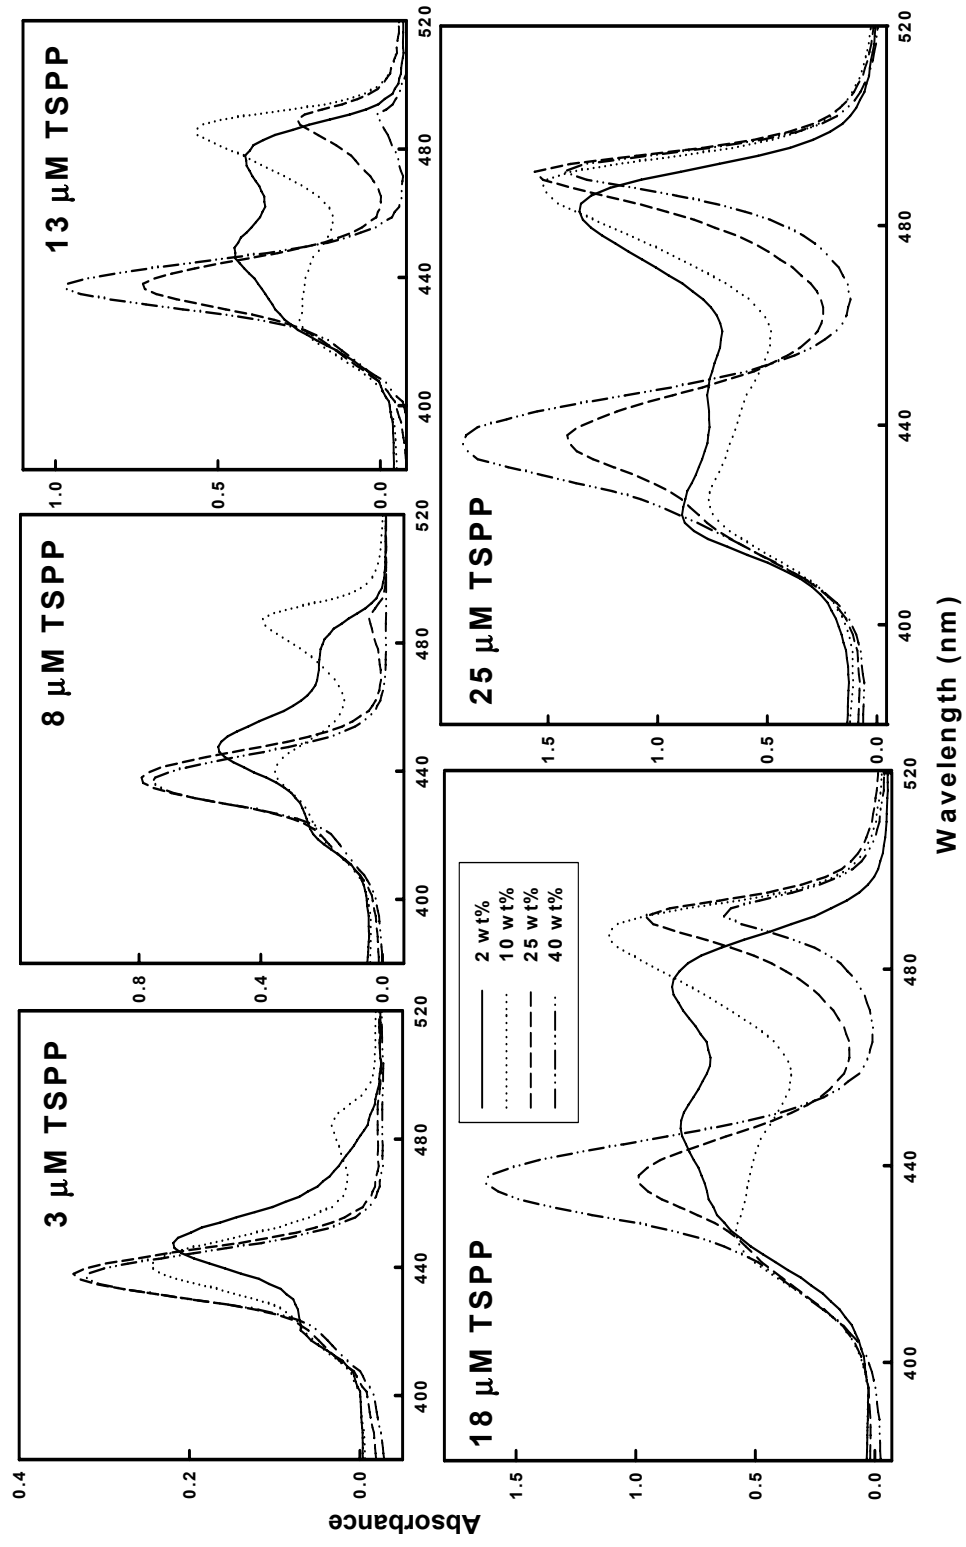

**Figure S2:** TPPS concentration-dependent absorbance spectra within [bmim][BF<sub>4</sub>] in presence of different wt% of 0.2 M aqueous HCl at ambient conditions.

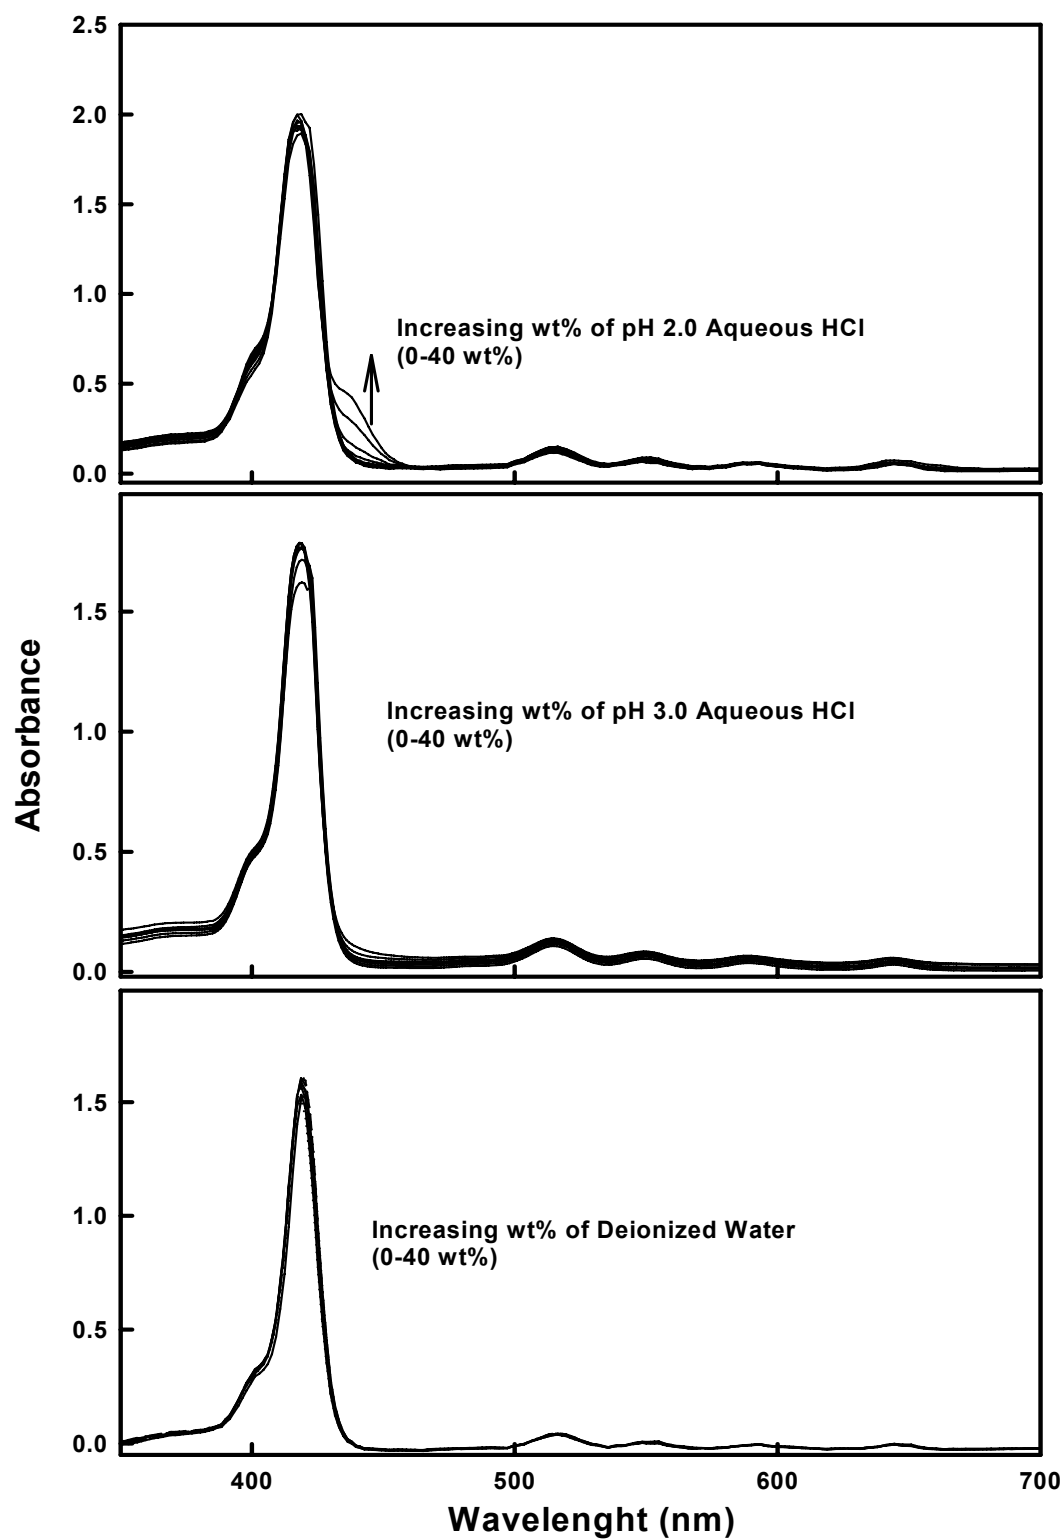

**Figure S3:** Absorbance spectra of TPPS (10 μM) within [bmim][BF<sub>4</sub>] in presence of different wt% of pH 2.0 and 3.0 aqueous HCl and deionized water at ambient conditions.

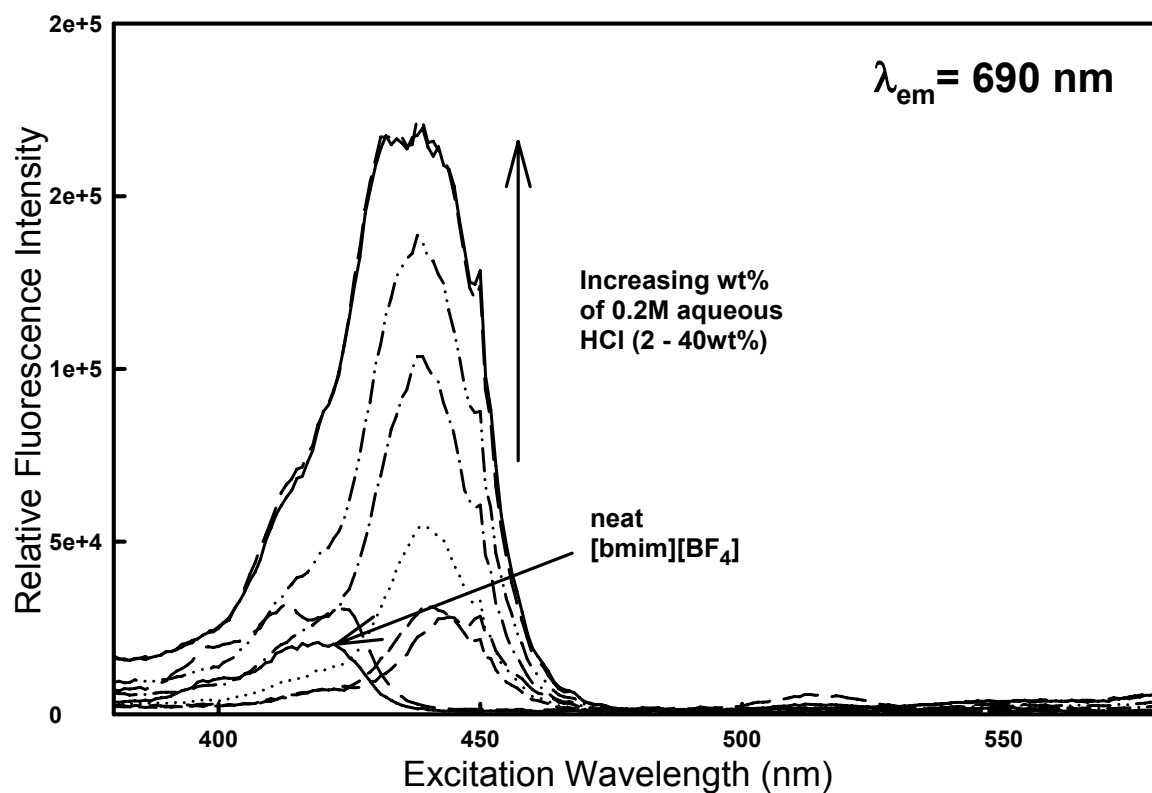

**Figure S4:** Fluorescence excitation spectra with  $\lambda_{emission} = 690 \text{ nm}$  of TPPS ( $5 \mu\text{M}$ ) within [bmim][BF<sub>4</sub>] in presence of 0 to 40 wt% of 0.2 M aqueous HCl at ambient conditions.

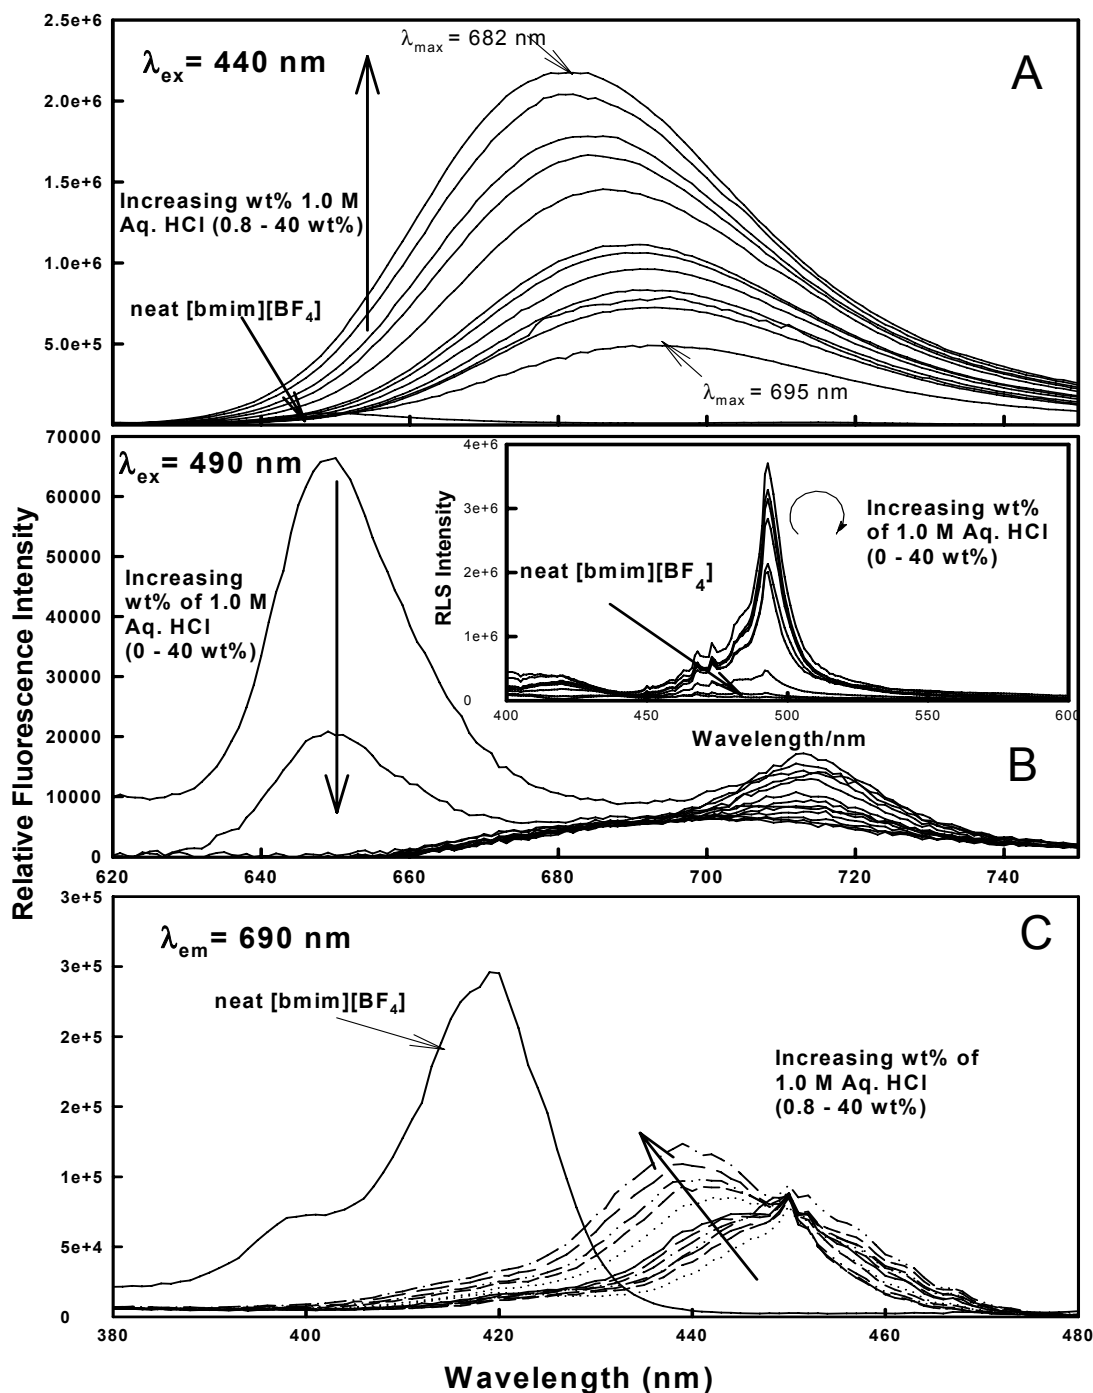

**Figure S5:** Emission spectra of 5  $\mu\text{M}$  TPPS with  $\lambda_{\text{excitation}} = 440 \text{ nm}$  (panel A) and  $\lambda_{\text{excitation}} = 490 \text{ nm}$  (panel B) within [bmim][BF<sub>4</sub>] in presence of different wt% of 1.0 M aqueous HCl at ambient conditions. Panel C and inset of panel B shows excitation spectra with  $\lambda_{\text{emission}} = 690 \text{ nm}$  and RLS spectra of same solutions, respectively, at ambient conditions.



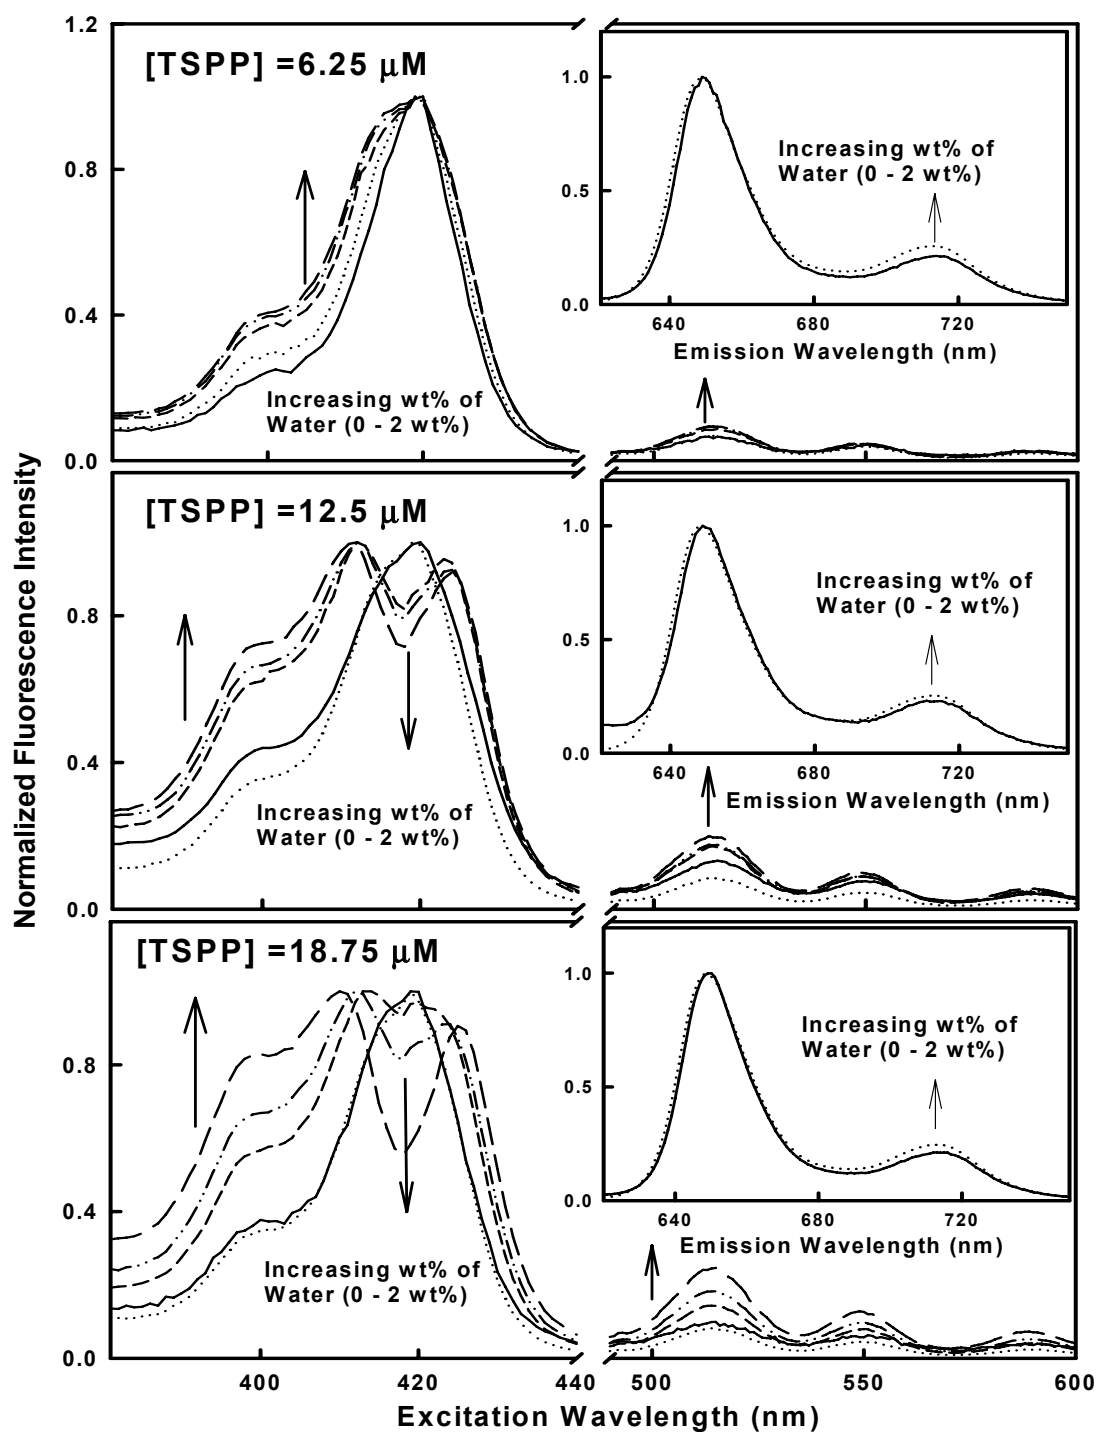

**Figure S6:** Excitation spectra of TPPS with  $\lambda_{em} = 650$  nm at different TPPS concentrations within [bmim][BF<sub>4</sub>] in presence of varying wt% of deionized water at ambient conditions. Insets shows the emission spectra of the same solutions at  $\lambda_{ex} = 420$  nm.
